# Supplementary material for: Theoretical prediction of chiral actinide endohedral borospherenes
Source: Royal Society of Chemistry journal article supplement (doi:10.1039/d1nj00211b), 2021-01-01
Supplement: d1nj00211b1.pdf [file d1nj00211b1.pdf]

## Electronic Supplementary Material (ESI) for New Journal of Chemistry

### Theoretical Prediction of Chiral Actinide Endohedral Borospherenes

*Naixin Zhang,<sup>‡a,b</sup> Ailin Li,<sup>‡a,b</sup> Cong-Zhi Wang,<sup>\*a</sup> Qun-Yan Wu,<sup>a</sup> Jian-Hui Lan,<sup>a</sup> Zhi-Fang Chai,<sup>a,c</sup> Yu-Bao Zhao,<sup>b</sup> and Wei-Qun Shi<sup>\*a</sup>*

<sup>a</sup>Laboratory of Nuclear Energy Chemistry, Institute of High Energy Physics, Chinese Academy of Sciences, Beijing 100049, China

<sup>b</sup>School of Chemistry and Chemical Engineering, University of South China, Hengyang 421001, China

<sup>c</sup>Engineering Laboratory of Advanced Energy Materials, Ningbo Institute of Industrial Technology, Chinese Academy of Sciences, Ningbo, Zhejiang, 315201, China

<sup>‡</sup>The first two authors contributed equally to this work.

Email: shiwq@ihep.ac.cn, wangcongzhi@ihep.ac.cn

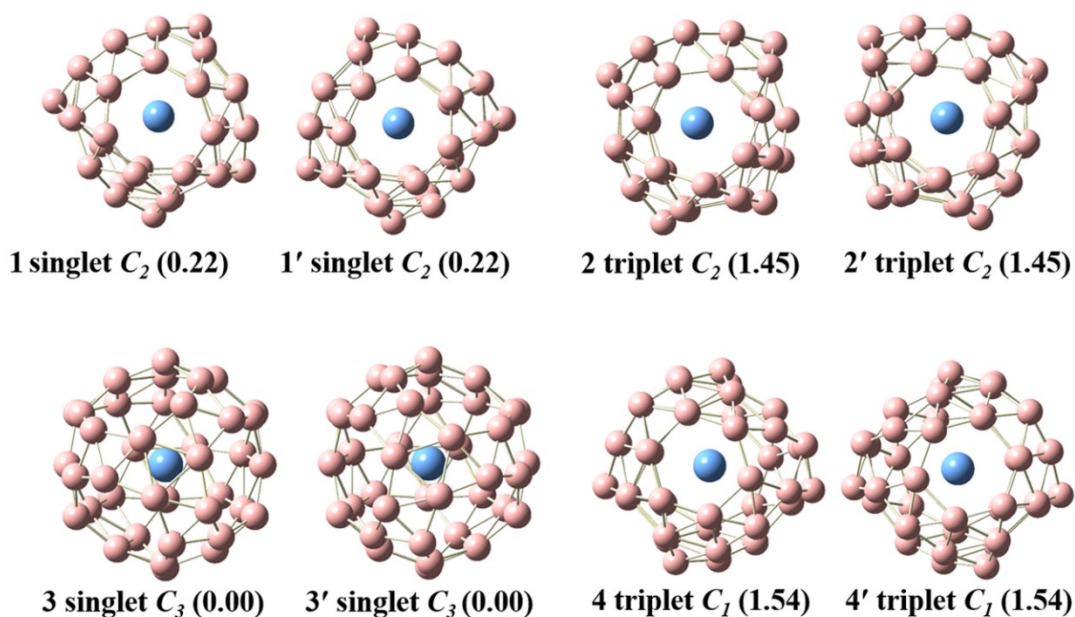

**Figure S1.** Low-lying isomers of  $[\text{Ac}@\text{B}_{39}]^{2+}$  with the relative energies (eV) at the PBE0/RECP/6-311+G\* levels. Light pink and blue spheres represent B and Ac, respectively. All the energies have been corrected for zero-point energies.

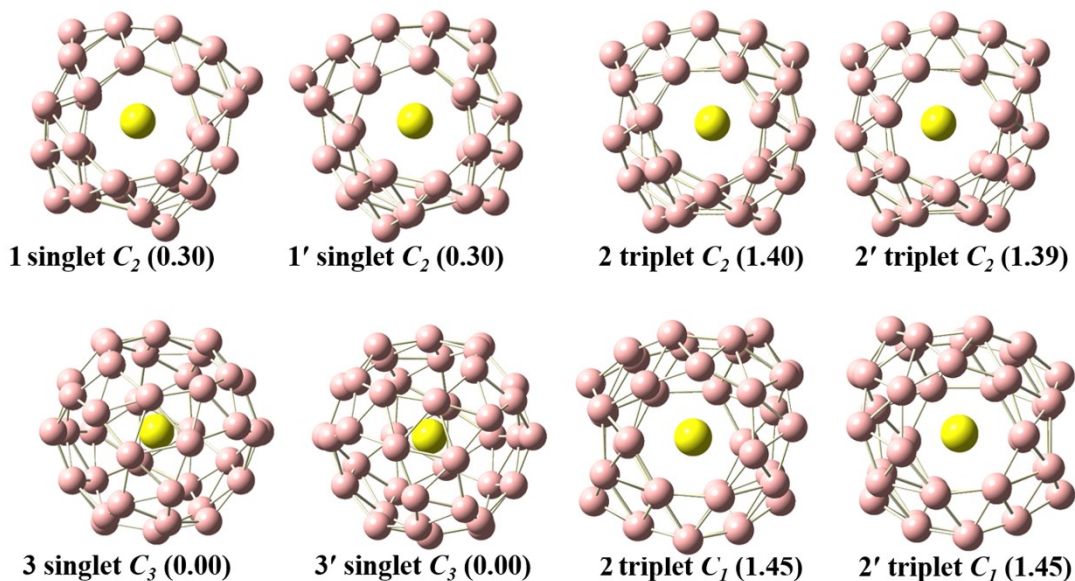

**Figure S2.** Low-lying isomers of  $[\text{Th}@\text{B}_{39}]^{3+}$  with the relative energies (eV) at the PBE0/RECP/6-311+G\* levels. Light pink and yellow spheres represent B and Th, respectively. All the energies have been corrected for zero-point energies.

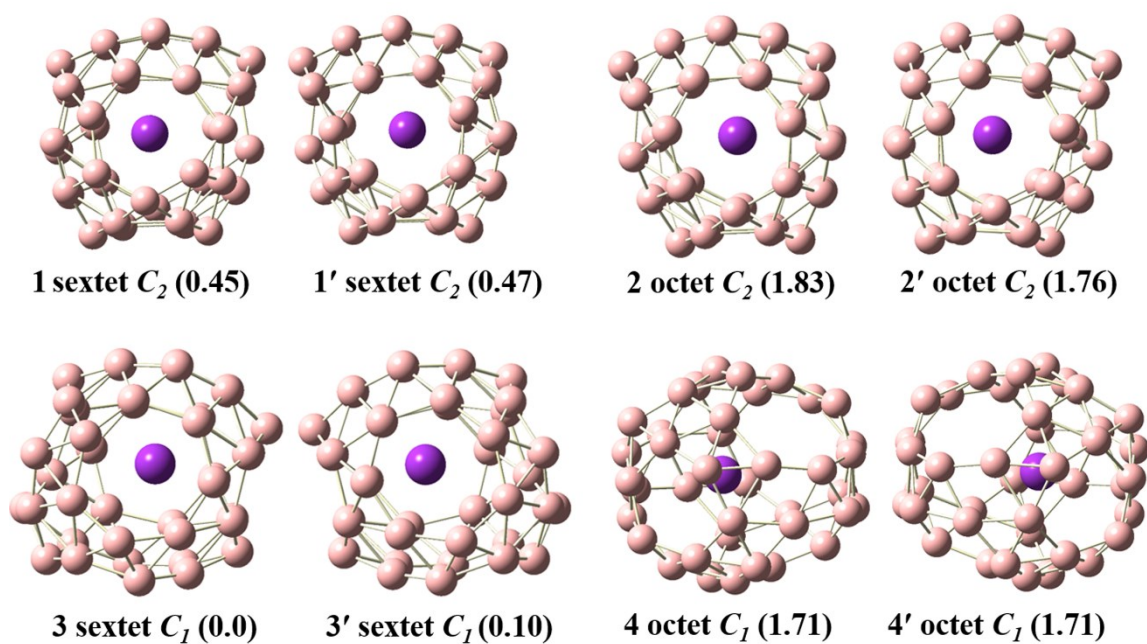

**Figure S3.** Low-lying isomers of  $[\text{Cf}@\text{B}_{39}]^{2+}$  with the relative energies (eV) at the PBE0/RECP/6-311+G\* levels. Light pink and yellow spheres represent B and Th, respectively. All the energies have been corrected for zero-point energies.

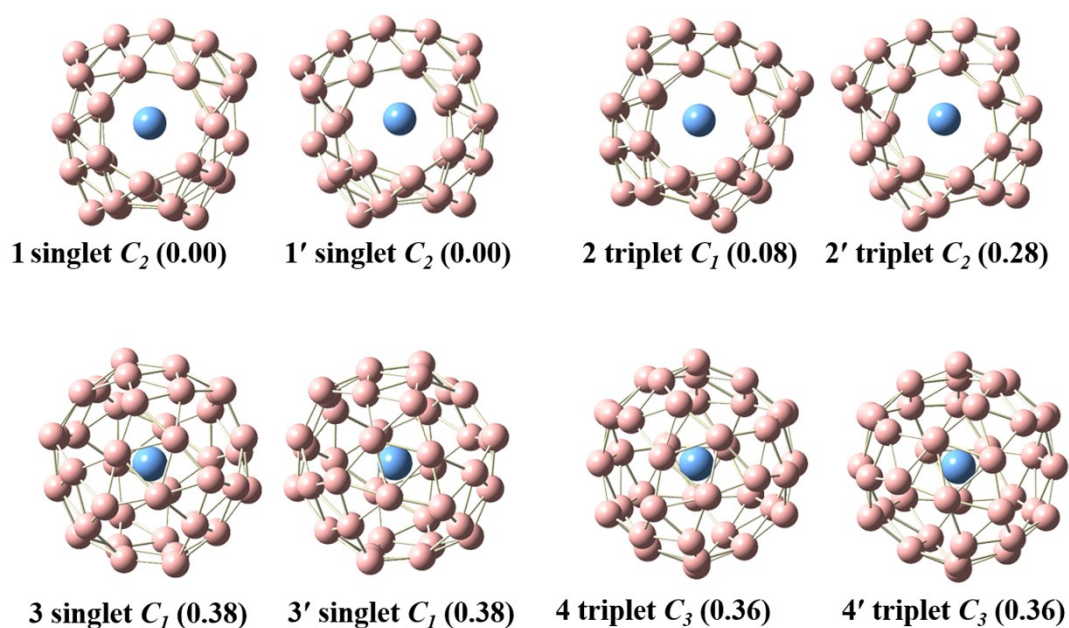

**Figure S4.** Low-lying isomers of  $\text{Ac}@\text{B}_{39}$  with the relative energies (eV) at the PBE0/RECP/6-311+G\* levels. Light pink and blue spheres represent B and Ac, respectively. All the energies have been corrected for zero-point energies.



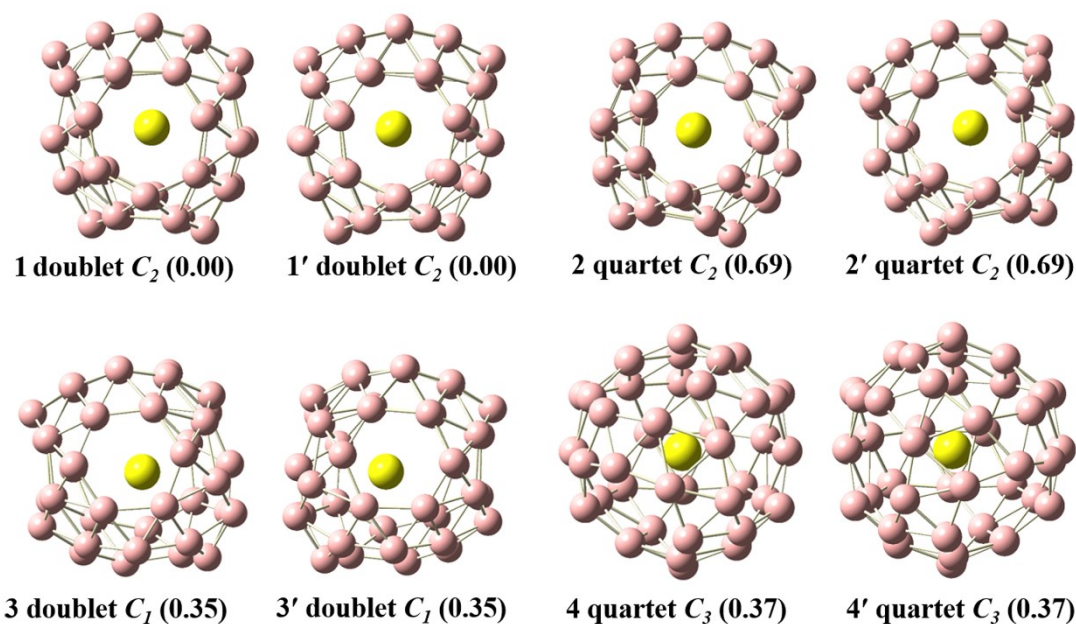

**Figure S5.** Low-lying isomers of Th@B<sub>39</sub> with the relative energies (eV) at the PBE0/RECP/6-311+G\* levels. Light pink and yellow spheres represent B and Th, respectively. All the energies have been corrected for zero-point energies.

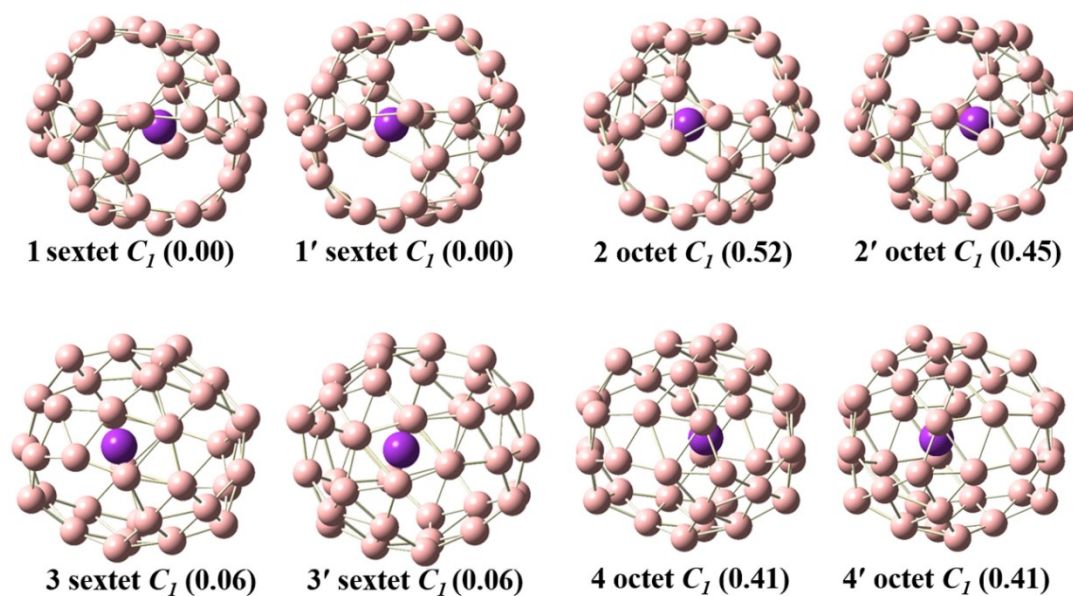

**Figure S6.** Low-lying isomers of Cf@B<sub>39</sub> with the relative energies (eV) at the PBE0/RECP/6-311+G\* levels. Light pink and yellow spheres represent B and Th, respectively. All the energies have been corrected for zero-point energies.

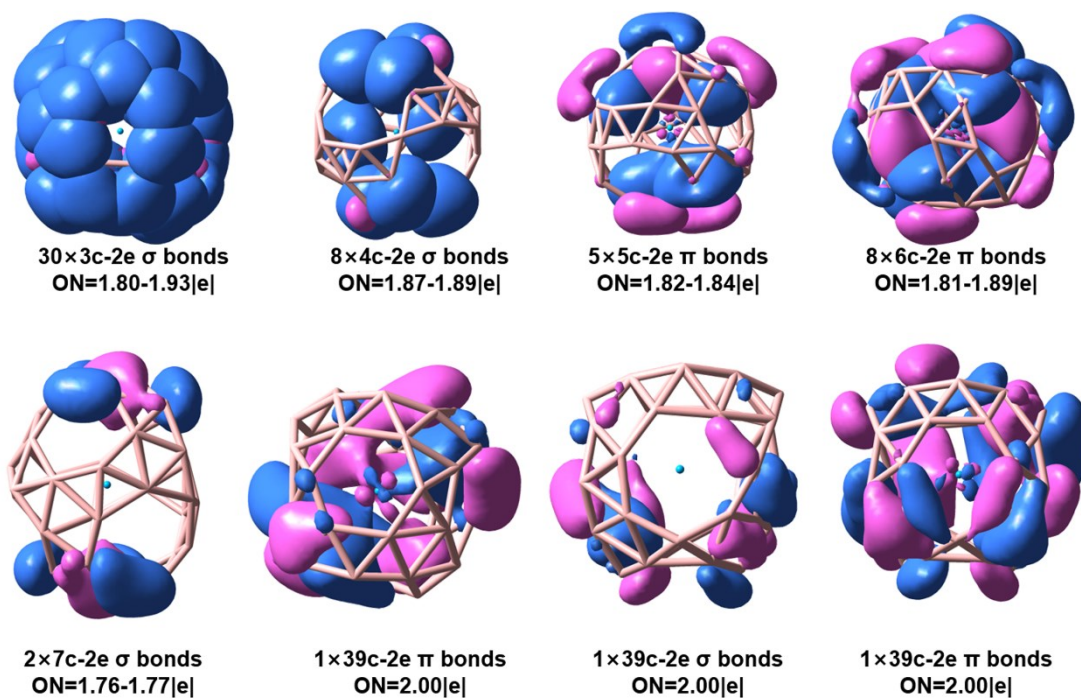

**Figure S7.** Bonding pattern of  $C_2 [Th@B_{39}]^{3+}$  from AdNDP analysis with the occupation numbers (ONs) indicated at the PBE0/6-311+G\*/RECP level of theory.

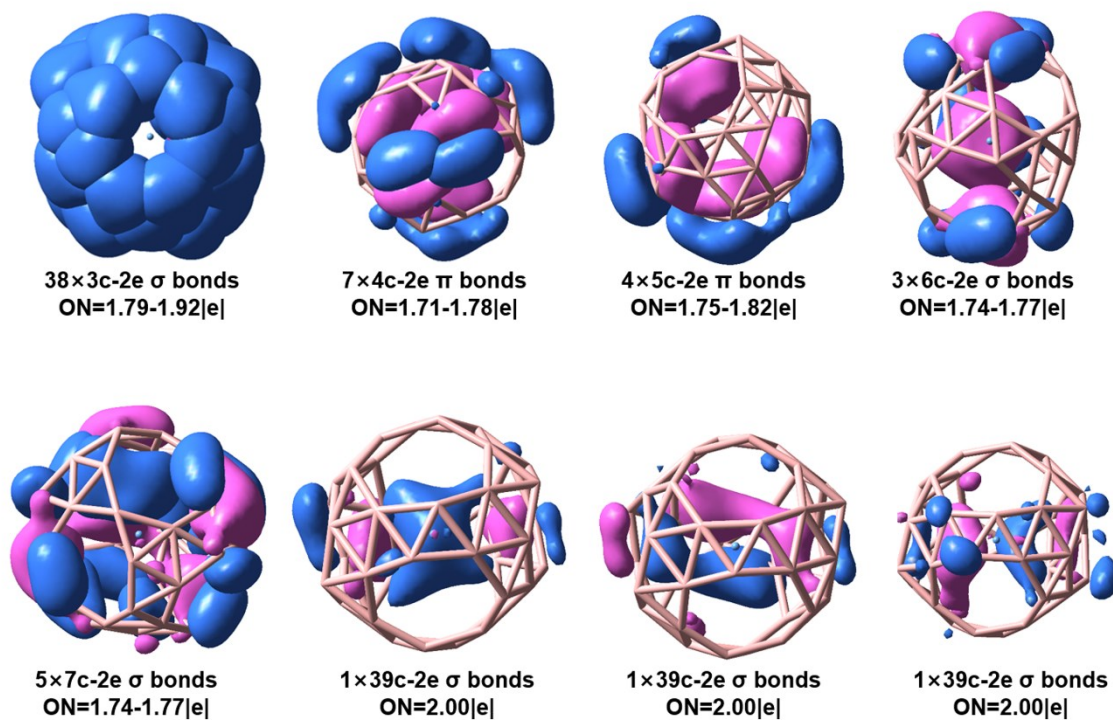

**Figure S8.** Bonding pattern of  $C_2 Ac@B_{39}$  from AdNDP analysis with the ONs indicated at the PBE0/6-311+G\*/RECP level of theory.

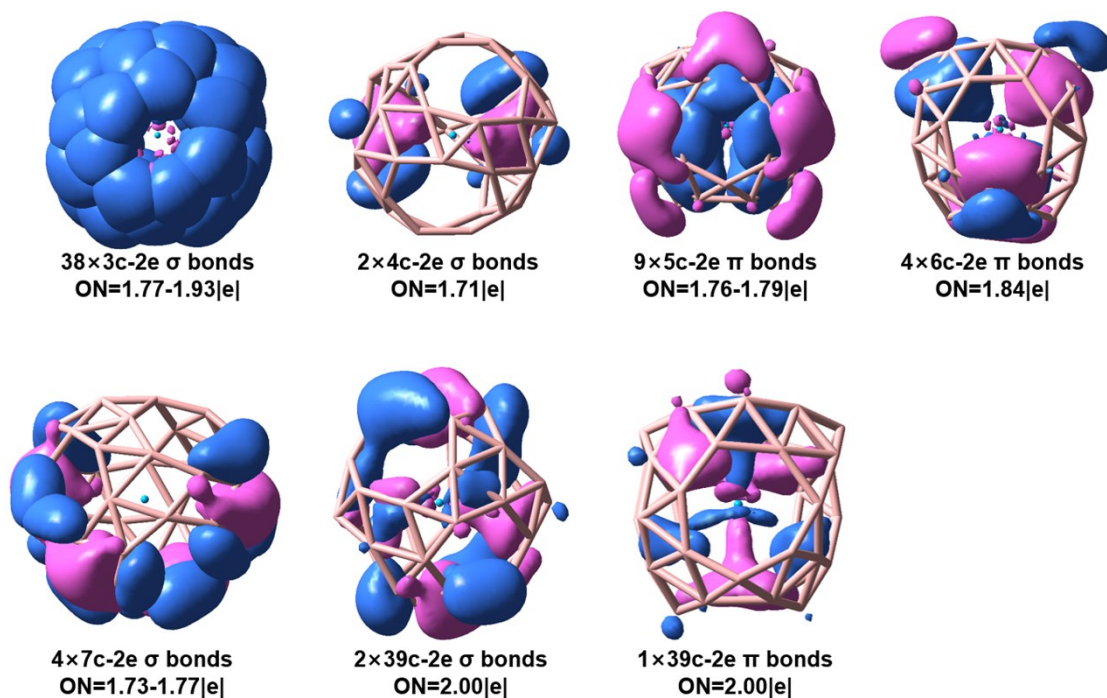

**Figure S9.** Bonding pattern of  $C_2$  Th@B<sub>39</sub> from AdNDP analysis with the ONs indicated at the PBE0/6-311+G\*/RECP level of theory.

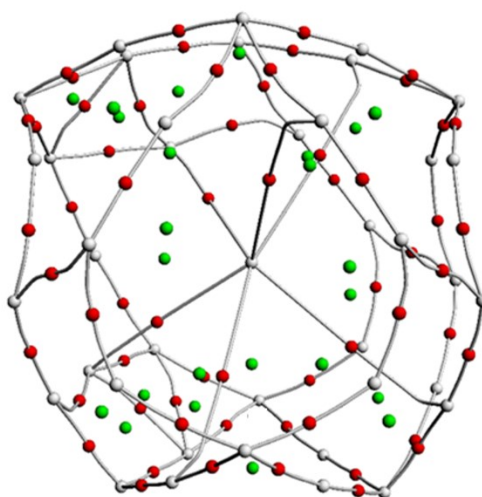

**Figure S10.** QTAIM analysis of  $C_2$  [Th@B<sub>39</sub>]<sup>3+</sup> at the PBE0/6-311+G\*/RECP level of theory. Red points represent bond critical points, gray lines represent bond paths. Green points represent ring critical points, blue points represent cage critical points.



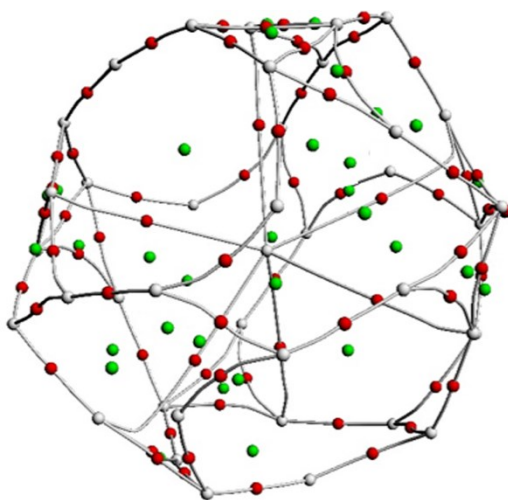

**Figure S11.** QTAIM analysis of C<sub>2</sub> Ac@B<sub>39</sub> at the PBE0/6-311+G\*/RECP level of theory.

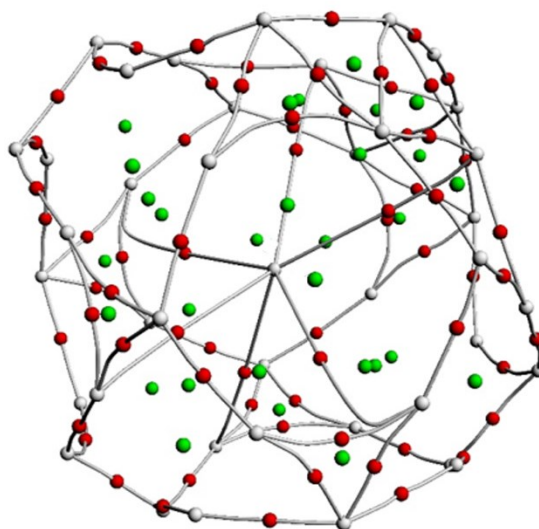

**Figure S12.** QTAIM analysis of C<sub>2</sub> Th@B<sub>39</sub> at the PBE0/6-311+G\*/RECP level of theory.

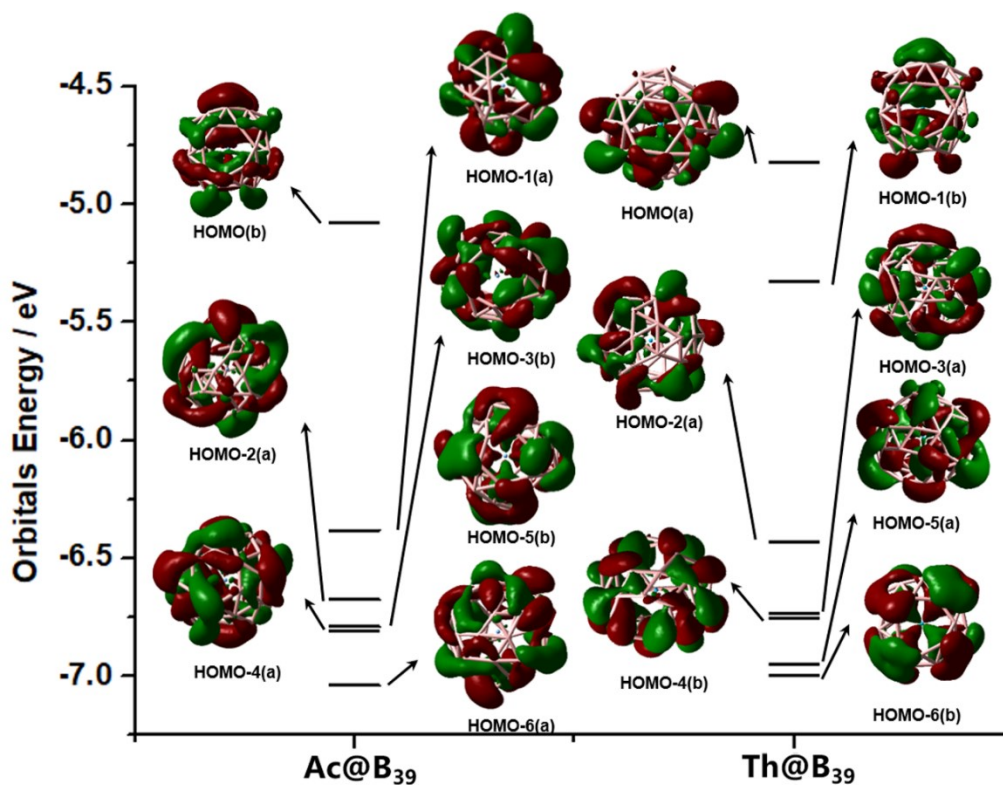

**Figure S13.** The frontier molecular orbitals of Ac@B<sub>39</sub> and Th@B<sub>39</sub> at the PBE0/6-311+G\*/RECP level of theory.

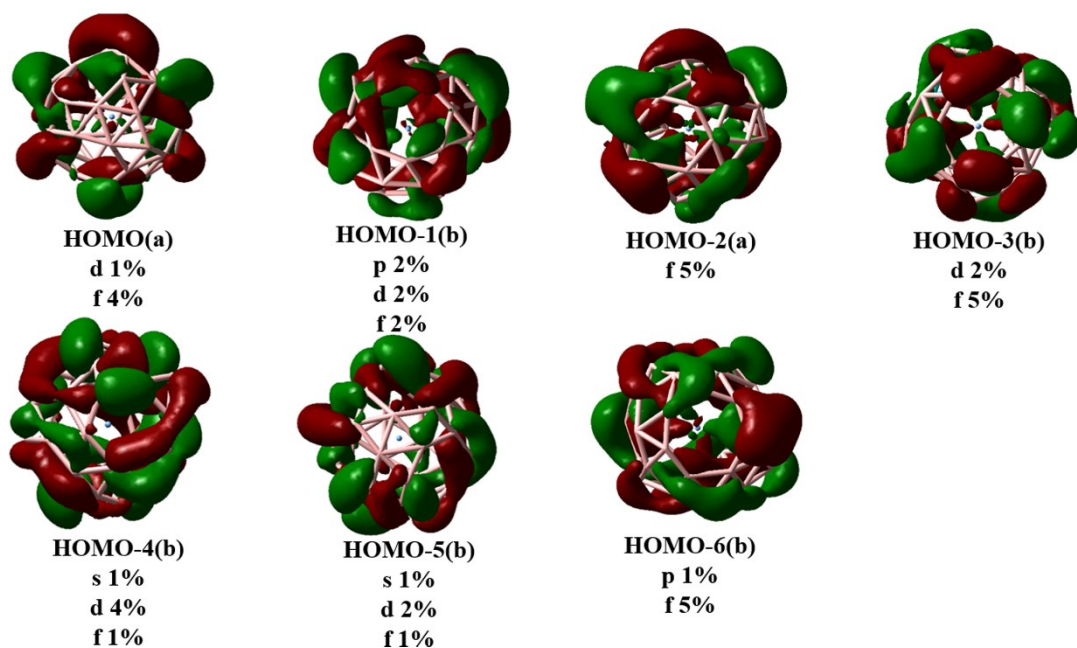

**Figure S14.** The composition of MO for [Ac@B<sub>39</sub>]<sup>2+</sup> at the PBE0/6-311+G\*/RECP level of theory.



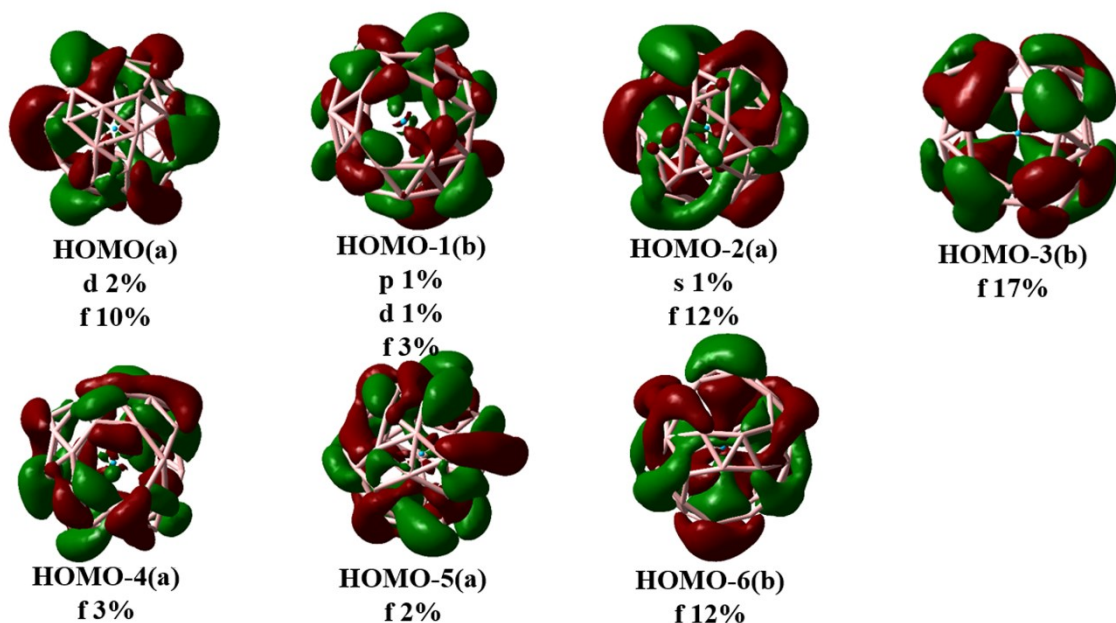

**Figure S15.** The composition of MO for  $[\text{Th}@\text{B}_{39}]^{3+}$  at the PBE0/6-311+G\*/RECP level of theory.

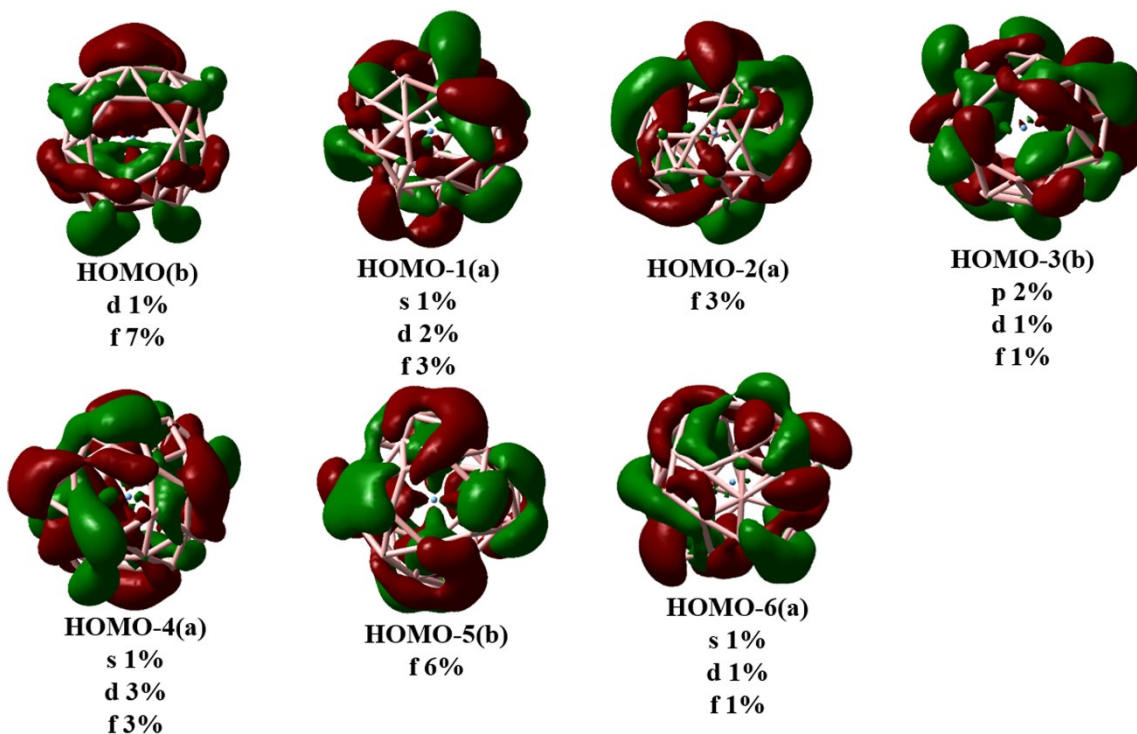

**Figure S16.** The composition of MO for  $\text{Ac}@\text{B}_{39}$  at the PBE0/6-311+G\*/RECP level of theory.

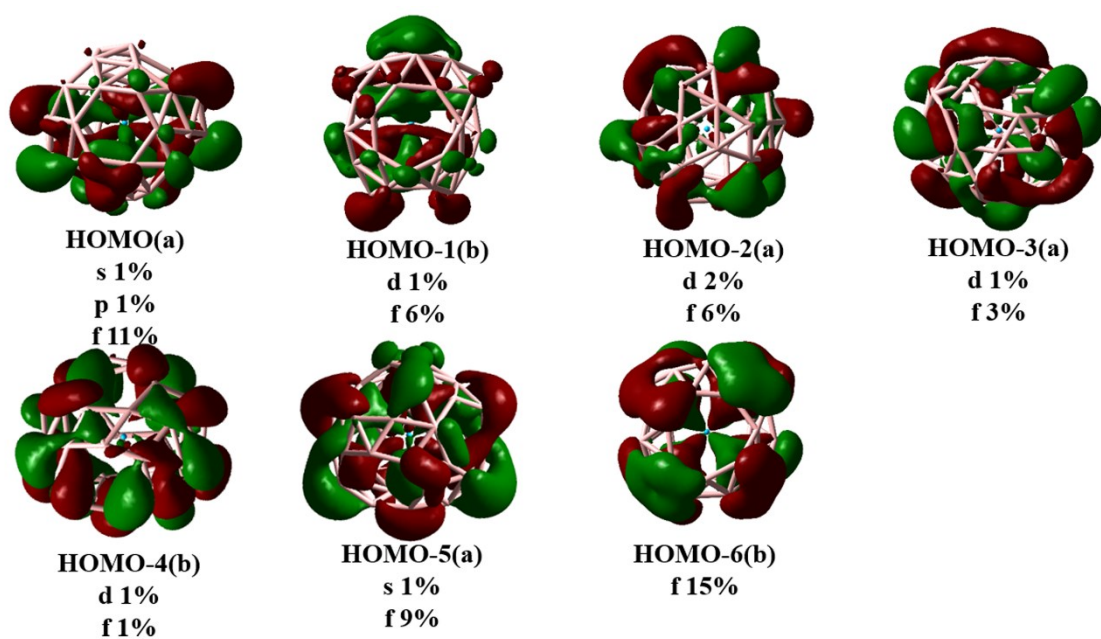

**Figure S17.** The composition of MO for Th@B<sub>39</sub> at the PBE0/6-311+G\*/RECP level of theory.

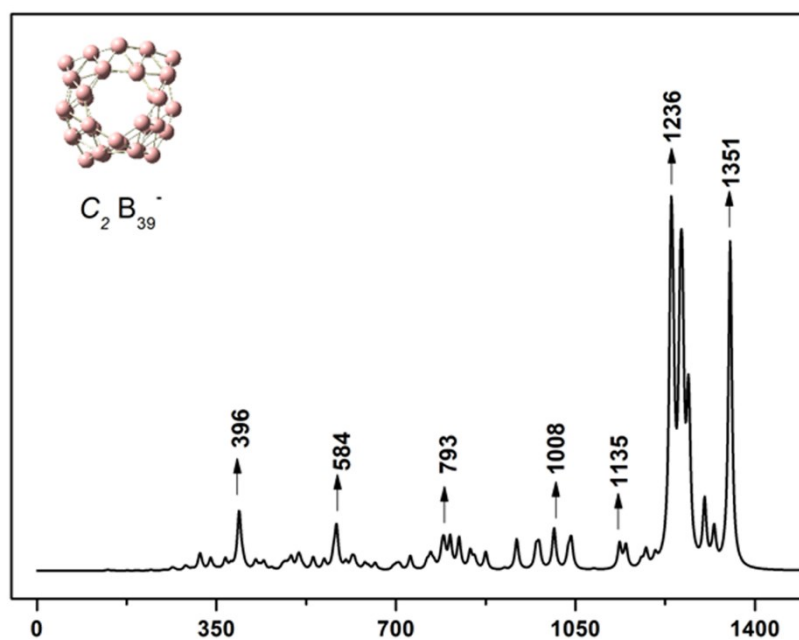

**Figure S18.** The infrared spectra of  $C_2 B_{39}^-$  at the PBE0/6-311+G\*/RECP level of theory.

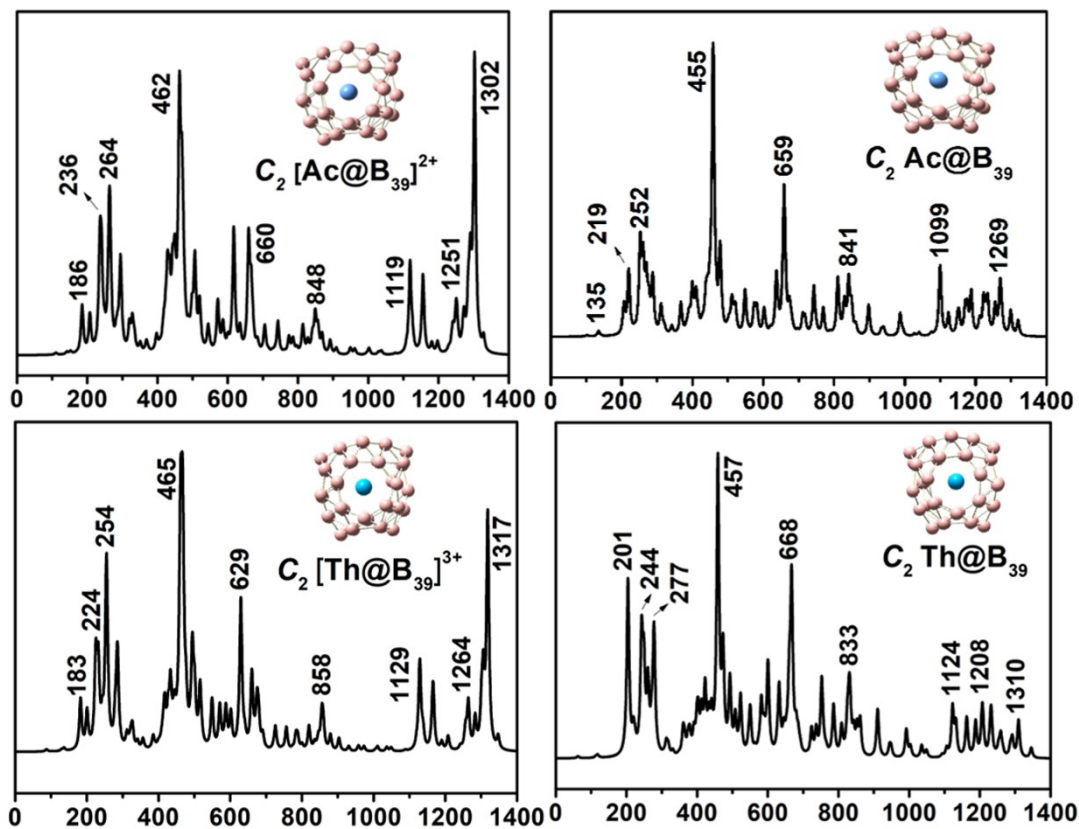

**Figure S19.** The Raman spectra of  $[\text{An}@\text{B}_{39}]^{n+}$  at the PBE0/6-311+G\*/RECP level of theory.

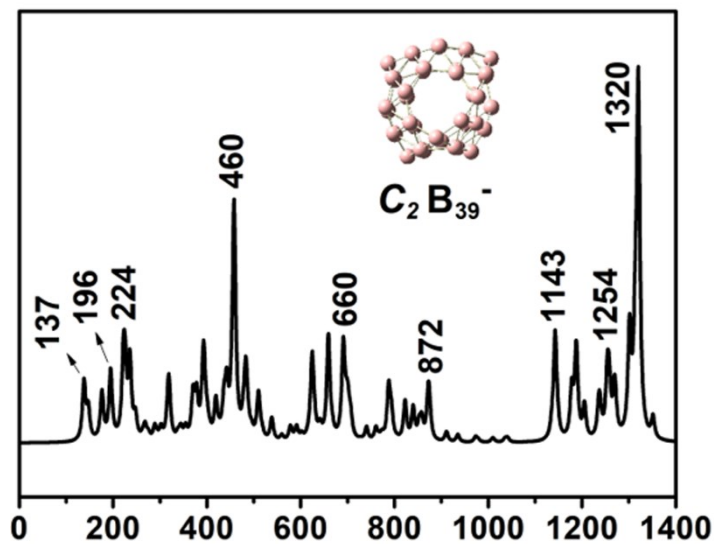

**Figure S20.** The Raman spectra of  $\text{C}_2 \text{B}_{39}^-$  at the PBE0/6-311+G\*/RECP level of theory.



**Table S1.** Mayer bond orders (MBOs) of the An-B bonds for  $[\text{An}@B_{39}]^{n+}$  calculated by the PBE0 method.

| Species                      | MBOs          | Total MBOs |
|------------------------------|---------------|------------|
| $C_2[\text{Ac}@B_{39}]^{2+}$ | 0.022 - 0.119 | 2.168      |
| $C_2\text{Ac}@B_{39}$        | 0.048 - 0.115 | 3.230      |
| $C_2[\text{Th}@B_{39}]^{3+}$ | 0.146 - 0.304 | 7.352      |
| $C_2\text{Th}@B_{39}$        | 0.140 - 0.264 | 6.898      |

**Table S2.** The EDA results (kcal/mol) of  $\text{Th}@B_{39}$  with  $\text{Th}^{4+}$  and  $B_{39}^{4-}$  as the two fragments at the PBE/TZP/ZORA level of theory.

| Species            | $\Delta E_{\text{Pauli}}$ | $\Delta E_{\text{elstat}}$ | $\Delta E_{\text{steric}}$ | $\Delta E_{\text{orb}}$ | $\Delta E_{\text{int}}$ |
|--------------------|---------------------------|----------------------------|----------------------------|-------------------------|-------------------------|
| $\text{Th}@B_{39}$ | 212.5                     | -1076.5<br>(49.9%)         | -864.0                     | -1079.5<br>(50.1%)      | -1943.5                 |

**Table S3.** In the QTAIM analysis of  $C_2[\text{Ac}@B_{39}]^{2+}$ , density of electrons  $\rho$ , energy density  $H(r)$ , Laplacian of electron density  $\nabla^2\rho$ , and electron localization function ELF at the PBE0/6-311+G\*/RECP level.

| Name                         | CP Path | Bond Distances | $\rho$  | $H(r)$   | $\nabla^2\rho$ | ELF   |
|------------------------------|---------|----------------|---------|----------|----------------|-------|
| $C_2[\text{Ac}@B_{39}]^{2+}$ | 1       | 2.987          | 0.02694 | -0.00097 | 0.06686        | 0.134 |
|                              | 2       | 2.815          | 0.03388 | -0.00387 | 0.07179        | 0.179 |
|                              | 3       | 3.012          | 0.02672 | -0.00123 | 0.06130        | 0.147 |
|                              | 4       | 2.815          | 0.03388 | -0.00387 | 0.07179        | 0.179 |
|                              | 5       | 3.012          | 0.02672 | -0.00123 | 0.06130        | 0.147 |
|                              | 6       | 2.987          | 0.02694 | -0.00097 | 0.06685        | 0.134 |

**Table S4.** In the QTAIM analysis of  $C_2 [Th@B_{39}]^{3+}$ ,  $\rho$ ,  $H(r)$ ,  $\nabla^2\rho$ , and ELF at the PBE0/6-311+G\*/RECP level.

| Name                   | CP Path | Bond Distances | $\rho$  | $H(r)$   | $\nabla^2\rho$ | ELF   |
|------------------------|---------|----------------|---------|----------|----------------|-------|
| $C_2 [Th@B_{39}]^{3+}$ | 1       | 2.971          | 0.03002 | -0.00285 | 0.05971        | 0.180 |
|                        | 2       | 2.776          | 0.03947 | -0.00728 | 0.06586        | 0.234 |
|                        | 3       | 2.983          | 0.03043 | -0.00355 | 0.05351        | 0.202 |
|                        | 4       | 2.776          | 0.03947 | -0.00728 | 0.06586        | 0.234 |
|                        | 5       | 2.983          | 0.03042 | -0.00355 | 0.05351        | 0.202 |
|                        | 6       | 2.971          | 0.03002 | -0.00285 | 0.05971        | 0.180 |

**Table S5.** In the QTAIM analysis of  $C_2 Ac@B_{39}$ ,  $\rho$ ,  $H(r)$ ,  $\nabla^2\rho$ , and ELF at the PBE0/6-311+G\*/RECP level.

| Name            | CP Path | Bond Distances | $\rho$  | $H(r)$   | $\nabla^2\rho$ | ELF   |
|-----------------|---------|----------------|---------|----------|----------------|-------|
| $C_2 Ac@B_{39}$ | 1       | 3.009          | 0.02621 | -0.00061 | 0.06865        | 0.122 |
|                 | 2       | 2.938          | 0.03032 | -0.00235 | 0.06599        | 0.168 |
|                 | 3       | 2.824          | 0.03376 | -0.00369 | 0.06956        | 0.187 |
|                 | 4       | 2.938          | 0.03032 | -0.00235 | 0.06599        | 0.168 |
|                 | 5       | 2.824          | 0.03376 | -0.00369 | 0.06956        | 0.187 |
|                 | 6       | 3.009          | 0.02621 | -0.00061 | 0.06865        | 0.122 |

**Table S6.** In the QTAIM analysis of  $C_2$  Th@B<sub>39</sub>,  $\rho$ ,  $H(r)$ ,  $\nabla^2\rho$ , and ELF at the PBE0/6-311+G\*/RECP level.

| Name                     | CP Path | Bond Distances | $\rho$  | $H(r)$   | $\nabla^2\rho$ | ELF   |
|--------------------------|---------|----------------|---------|----------|----------------|-------|
| $C_2$ Th@B <sub>39</sub> | 1       | 2.990          | 0.02889 | -0.00233 | 0.06539        | 0.149 |
|                          | 2       | 2.772          | 0.03944 | -0.00721 | 0.06397        | 0.242 |
|                          | 3       | 2.908          | 0.03409 | -0.00492 | 0.05870        | 0.216 |
|                          | 4       | 2.772          | 0.03944 | -0.00721 | 0.06397        | 0.242 |
|                          | 5       | 2.908          | 0.03409 | -0.00492 | 0.05870        | 0.216 |
|                          | 6       | 2.990          | 0.02889 | -0.00233 | 0.06539        | 0.149 |

**Table S7.** The formation energy (kcal/mol) of  $[An@B_{39}]^{n+}$  at the PBE0/6-311+G\*/RECP level.

| Reactions                               | Formation Energy |
|-----------------------------------------|------------------|
| $Ac^{3+} + B_{39}^- = [Ac@B_{39}]^{2+}$ | -529.1           |
| $Ac^+ + B_{39}^- = Ac@B_{39}$           | -212.5           |
| $Th^{4+} + B_{39}^- = [Th@B_{39}]^{3+}$ | -1009.2          |
| $Th^+ + B_{39}^- = Th@B_{39}$           | -296.8           |
